1  
2  
3  
4  
5  
6  
7  
8  
9  
10  
11  
12  
13  
14  
15  
16  
17  
18  
19  
20  
21  
22  
23  
24  
25  
26  
27  
28  
29  
30  
31  
32  
33  
34

**Title:** Medial prefrontal cortex compresses concept representations through learning

**Brief title:** Medial PFC compression during learning

**Authors:** Michael L. Mack<sup>a</sup>, Alison R. Preston<sup>b,c,d\*</sup>, Bradley C. Love<sup>e,f\*</sup>

**Affiliations:**

<sup>a</sup>Department of Psychology, University of Toronto, Toronto, ON, CA

<sup>b</sup>Department of Psychology, The University of Texas at Austin, Austin, TX, USA

<sup>c</sup>Center for Learning and Memory, The University of Texas at Austin, Austin, TX, USA

<sup>d</sup>Department of Neuroscience, The University of Texas at Austin, Austin, TX, USA

<sup>e</sup>Experimental Psychology, University College London, London, UK

<sup>f</sup>Alan Turing Institute, London, UK

\*Authors contributed equally

**Corresponding Author:**

Michael L. Mack

Department of Psychology

University of Toronto

100 St. George Street, 4<sup>th</sup> Floor

Toronto, Ontario M5S 3G3

mack.michael@gmail.com

**Keywords:** prefrontal cortex; fMRI; attention; category learning; computational modeling

## Abstract

35  
36  
37  
38  
39  
40  
41  
42  
43  
44  
45  
46  
47  
48

Prefrontal cortex (PFC) is thought to support the ability to focus on goal-relevant information by filtering out irrelevant information, a process akin to dimensionality reduction. Here, we test this dimensionality reduction hypothesis by combining a data-driven approach to characterizing the complexity of neural representation with a theoretically-supported computational model of learning. We find direct evidence of goal-directed dimensionality reduction within human medial PFC during learning. Importantly, by using model predictions of each participant's attentional strategies during learning, we find that that the degree of neural compression predicts an individual's ability to selectively attend to concept-specific information. These findings suggest a domain-general mechanism of learning through compression in mPFC.

## 49 Introduction

50

51 Prefrontal cortex (PFC) is sensitive to the complexity of incoming information (Badre,  
52 Kayser, & D'Esposito, 2010) and theoretical perspectives suggest that a core function of  
53 PFC is to focus representation on goal-relevant features by filtering out irrelevant  
54 content (Mante, Sussillo, Shenoy, & Newsome, 2013; Wilson, Takahashi, Schoenbaum,  
55 & Niv, 2014). In particular, medial PFC (mPFC) is thought to represent the latent  
56 structures of experience (Schlichting, Mumford, & Preston, 2015; Zeithamova,  
57 Dominick, & Preston, 2012), coding for causal links (Chan, Niv, & Norman, 2016) and  
58 task-related cognitive maps (Schuck et al., 2016). At the heart of these accounts is the  
59 hypothesis that during learning, mPFC performs data reduction on incoming  
60 information, compressing task-irrelevant features and emphasizing goal-relevant  
61 information structures. This compression process is goal-directed and akin to how  
62 attention in category learning models dynamically selects features that have proven  
63 predictive across recent learning trials (Love & Gureckis, 2007; Love, Medin, &  
64 Gureckis, 2004). Although emerging evidence suggests structured representations  
65 occur in the rodent homologue of mPFC (Farovik et al., 2015), such coding in human  
66 PFC remains poorly understood. Here, we directly assess the data reduction hypothesis  
67 by leveraging an information-theoretic approach in human neuroimaging to measure  
68 how goal-driven learning is supported by attention updating processes in mPFC.

69

70 We focused on concept learning, given the recent findings that mPFC represents  
71 conceptual information in an organized fashion (Constantinescu, O'Reilly, & Behrens,  
72 2016). Participants learned to classify the same insect images (Figure 1A), composed of  
73 three features that could take on two values (thick/thin legs, thick/thin antennae,  
74 pincer/shovel mandible), across three different learning problems (Shepard, Hovland, &  
75 Jenkins, 1961). These learning problems were defined by rules that required  
76 consideration of different numbers of features to successfully classify (see Table 1): the  
77 low category complexity problem was unidimensional (e.g., insects living in warm  
78 climates have thick legs, cold climate insects have thin legs), the medium category  
79 complexity problem depended on two features (e.g., insects from rural environments  
80 have thick antennae and shovel mandible or thin antennae and pincer mandible, urban  
81 insects have thick antennae and pincer mandible or thin antennae and shovel  
82 mandible), and the high category complexity problem required all three features (i.e.,  
83 each insect's class was uniquely defined by a combination of features). By using the  
84 same stimuli for all three problems, the manipulation of conceptual complexity allowed  
85 us to target goal-specific learning processes.

86

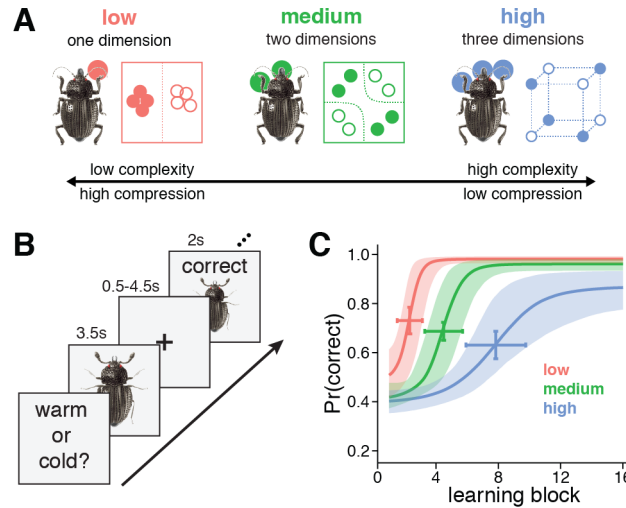

87

88 **Figure 1:** Experimental schematic and behavioral results. **A)** The learning problems differed in rule  
89 complexity (see Table S1). The low complexity problem was unidimensional (e.g., antennae size),  
90 medium complexity required a conjunction of two features (e.g., leg size and mandible shape), and high  
91 complexity required all three features. **B)** Learning blocks consisted of presentation of a stimulus for 3.5s,  
92 followed by a fixation cross for 0.5-4.5s, and then a feedback display for 2s that included the stimulus,  
93 accuracy of the response, and the correct category. Learning trials were separated by a delay of 2-6s of  
94 fixation. **C)** The probability of a correct response increased across learning blocks. The rate of learning  
95 differed according to the complexity of the problems.

96

97 This design allows us to ask the central question of whether compression in neural  
98 representation corresponds with the complexity of the problem-specific conceptual  
99 structure throughout learning. Complexity and compression have an inverse  
100 relationship; the lower the complexity of a conceptual space, the higher the degree of  
101 compression. For instance, in learning the unidimensional problem, variance along the  
102 two irrelevant feature dimensions can be compressed resulting in a lower complexity  
103 conceptual space. In contrast, learning the high complexity problem requires less  
104 compression because all three feature dimensions must be represented, resulting in a  
105 relatively more complex conceptual space. Differences in complexity across the three  
106 learning problems thus provide a means for testing how learning shapes the  
107 dimensionality of neural concept representations. Namely, brain regions involved in  
108 goal-directed data compression should *learn* to represent less complex problems with  
109 fewer dimensions.

110

## 111 Results

112

113 To test this prediction, we recorded functional magnetic resonance imaging (fMRI) data  
114 while participants learned the three problems and measured the degree that multivoxel  
115 activation patterns were compressed through learning using principal component

116 analysis (PCA; Figure 2A), a method for low-rank approximation of multidimensional  
117 data (Eckart & Young, 1936). Specifically, trial-level neural representations (Mumford,  
118 Turner, Ashby, & Poldrack, 2012) for each insect image were submitted to PCA, and the  
119 number of principal components (PC) that were necessary to explain 90% of the  
120 variance across trials within a learning block was used to calculate an index of neural  
121 compression (i.e., fewer PCs reflects more neural compression). This measure of neural  
122 compression was calculated across the whole brain with searchlight methods  
123 (Kriegeskorte, Goebel, & Bandettini, 2006) for each learning block in each problem. We  
124 then identified brain regions that reduce dimensionality with learning (i.e., learn to  
125 represent the less complex problems with fewer dimensions) by conducting a voxel-  
126 wise linear mixed effects regression on the searchlight compression maps. Specifically,  
127 at each voxel, we assessed how neural compression changed as a function of learning  
128 block and problem complexity and their interaction.  
129

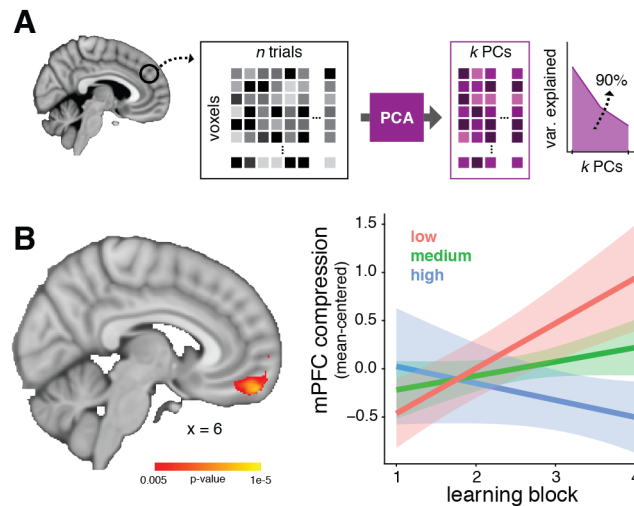

130  
131

132 **Figure 2:** Neural compression analysis schematic and results. **A)** Principal component analysis (PCA)  
133 was performed on neural patterns evoked for each of  $n$  trial within a learning block. The number of  
134 principal components (PC) required to explain 90% of the variance ( $k$ ) was used to calculate a neural  
135 compression score ( $1-k/n$ ). We quantified neural compression as a function of problem complexity and  
136 learning block; the interaction of these factors reflects changes in the complexity of neural representations  
137 that emerge with learning. **B)** A whole brain voxel-wise linear mixed effects regression revealed an mPFC  
138 region that showed a significant interaction between learning block and problem complexity. The nature of  
139 the interaction in the mPFC region is depicted in the interaction plot on the left. Shaded regions  
140 representing 95% confidence bands.

141

142 Throughout the entire brain, only a region within mPFC showed an interaction of  
143 problem complexity and learning block (peak coordinates [4, 54, -18]; 653 voxels; voxel-  
144 wise threshold = 0.001, cluster extent threshold = 0.05; Figure 2B). The nature of the  
145 interaction within this cluster showed that mPFC compression corresponded with

146 problem complexity and emerged over learning blocks ( $F_{1,253.8} = 19.02$ ,  $p = 1.9 \times 10^{-5}$ ).  
147 Importantly, the interaction effect was independent of individual differences in learning  
148 performance (see Materials and Methods for details about the voxel-wise regression  
149 modeling). Because the stimuli were identical across the three problems, this finding  
150 demonstrates that learning-related compression is goal-specific, with mPFC requiring  
151 fewer dimensions for less complex goals.

152

153 To assess whether mPFC compression tracked changes in attentional allocation, we  
154 characterized the participant-specific attentional weights given to each stimulus feature  
155 across the three problems using a computational learning model (Love et al., 2004).  
156 Attention weight entropy indexed changes in attentional allocation; high entropy  
157 indicates equivalent weighting to all three features, whereas low entropy indicates  
158 attention directed to only one feature. We found that across the learning problems,  
159 attention weight entropy increased with conceptual complexity ( $\beta = 0.121$ ,  $SE = 0.0176$ ,  
160  $t = 6.90$ ,  $p = 1.43 \times 10^{-8}$ ; Figure 3B). Importantly, the increase in attention weight entropy  
161 mirrored the decrease in mPFC neural compression ( $\beta = -0.021$ ,  $SE = 0.005$ ,  $t = -4.30$ ,  $p$   
162  $= 9.02 \times 10^{-5}$ ; Figure 3A), suggesting a link between the behavioral and neural signatures  
163 of dimensionality reduction.

164

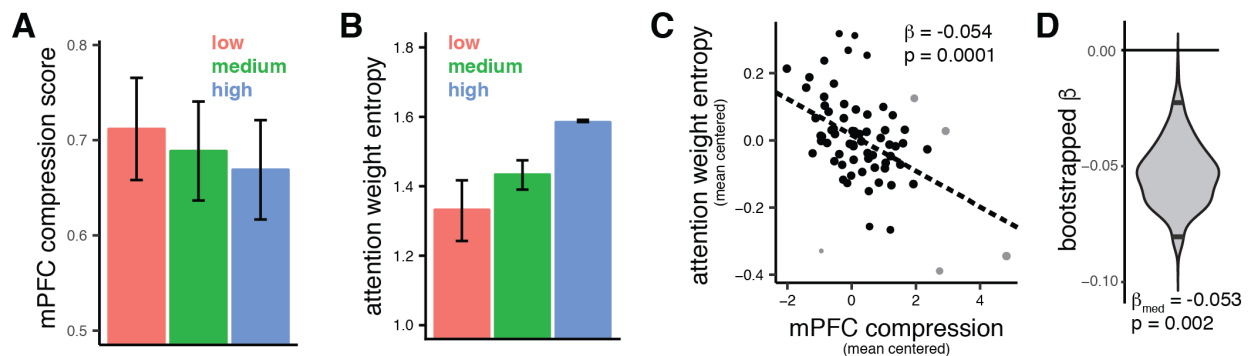

165

166

167 **Figure 3:** Relationship between mPFC compression and model-based attention weighting in the final  
168 learning block. **A)** mPFC neural compression decreased across problems, consistent with their complexity  
169 demands. **B)** Attention weight entropy (i.e., dispersion in attention weights) mirrored neural compression,  
170 showing attentional strategies consistent with the feature relevancy across the problems (error bars  
171 represent 95% CI of the means). **C)** mPFC compression predicted the degree of problem-specific  
172 attention weighting (indexed as attention weight entropy). The size of the scatterplot points depicts the  
173 weighting from a robust regression analysis; grey-colored points signify observations identified as outliers;  
174 the dashed line depicts the best-fitting regression line. **D)** The violin plot depicts a bootstrapped  
175 distribution of regression coefficients relating neural compression and attention entropy. Black lines within  
176 the distribution mark 95% confidence bounds.

177

178 To directly assess this relationship, we evaluated whether entropy of participants'  
179 attention weights was predicted by mPFC neural compression at the individual  
180 participant level. Specifically, if the ability to compress neural representations in a  
181 problem-appropriate fashion is related to participants' ability to attend to problem-  
182 relevant features, the prediction follows that participants with more neural compression  
183 for a given problem will also show more selective attention, thus lower entropy values. A  
184 regression analysis confirmed this hypothesis ( $\beta=-0.0536$ ,  $SE=0.0132$ ,  $t = -4.065$ ,  $p =$   
185  $0.0001$ ; see Figure 3C).

186  
187 To assess the reliability of this finding and evaluate the influence of potential outliers,  
188 we performed three additional analyses. First, we analyzed the relationship between  
189 neural compression and attention entropy with robust regression using a logistic  
190 weighting function. Robust regression accounts for potential outlier observations by  
191 down weighting observations that individually influence the estimation of a linear  
192 regression model between two variables. Consistent with the correlation results, the  
193 robust regression results showed evidence of a linear relationship between neural  
194 compression and attention weight entropy ( $\beta = -0.0532$ ,  $SE = 0.0122$ ,  $t = -4.358$ ,  $p <$   
195  $0.0001$ ). The weighting of each observation estimated in the robust regression analysis  
196 is depicted in Figure 3C as the relative size of the data points. Second, we identified  
197 and removed potential outliers by evaluating the standardized difference in fit statistic  
198 (DFFITS) for each observation. Using the standard DFFITS threshold (Aguinis,  
199 Gottfredson, & Joo, 2013), five observations were identified as outliers (noted as grey  
200 data points in Figure 3C). Even with these potential outlier observations removed a  
201 strong relationship remained ( $\beta = -0.056$ ,  $SE = 0.0122$ ,  $t = -3.691$ ,  $p = 0.0005$ ). Third, a  
202 nonparametric bootstrap analysis of the linear relationship between neural compression  
203 and attention entropy showed a robust effect (see Figure 3D; median  $\beta = -0.053$ ,  $p =$   
204  $0.002$ ,  $95\% CI [-0.0785, -0.0201]$ ). Collectively, these findings suggest that the degree  
205 of problem-specific neural compression in mPFC predicted participants' attentional  
206 strategies.

207

## 208 **Discussion**

209

210 By focusing on a mechanism by which mPFC forms and represents concepts through  
211 goal-sensitive dimensionality reduction, we show that neural representations in mPFC  
212 are shaped by experience. And, this shaping is adaptive, promoting efficient  
213 representation of information that focuses on encoding features that are most predictive  
214 of positive outcomes for a given goal. Importantly, by evaluating behavior through the  
215 lens of a theoretically-oriented computational model, we demonstrate that the process  
216 of learning to compress in mPFC is consistent with the mechanisms of SUSTAIN (Love

217 & Gureckis, 2007; Love et al., 2004). These findings provide a quantitative account of  
218 mPFC's role in the coding of schematic models or cognitive maps (Constantinescu et  
219 al., 2016; Schuck et al., 2016; Wikenheiser & Schoenbaum, 2016), specifically in the  
220 conceptual domain.

221  
222 Successfully learning new concepts requires attending to goal-diagnostic features and  
223 ignoring irrelevant information to build abstracted representations that capture the  
224 structure defining a concept (Love et al., 2004). Viewed in these terms, concept learning  
225 has many parallels to schema formation, a mPFC-related function born out of lesion  
226 studies in the memory literature (Gilboa & Marlatte, 2017). Schemas are defined as  
227 structured memory networks that represent associative relationships among prior  
228 experiences and provide predictions for new experiences (Schlichting et al., 2015; Tse  
229 et al., 2011; van Kesteren, Fernández, Norris, & Hermans, 2010; Zeithamova et al.,  
230 2012). Schema-related memory behaviors are significantly impacted by mPFC lesions.  
231 For example, mPFC lesion patients exhibit a reduced influence of prior knowledge  
232 during recognition of items presented in schematically congruent contexts compared  
233 with healthy controls (Spalding, Jones, Duff, Tranel, & Warren, 2015). Moreover, mPFC  
234 lesions have been associated with a marked inability to differentiate schema-related  
235 concepts from concepts inappropriate for a given schema (Ghosh, Moscovitch, Melo  
236 Colella, & Gilboa, 2014). From this work, it is clear that mPFC is necessary for retrieving  
237 generalized representations built from prior events that are relevant to current  
238 experience. Such guided retrieval of relevant learned representations is key to building  
239 new concepts.

240  
241 A key proposal of the SUSTAIN computational model we leveraged is that concept  
242 learning is decidedly goal-based, with concept representations adaptively formed to  
243 reflect the task at hand (Love et al., 2004). Recent rodent and human work support this  
244 proposal with findings that latent mPFC representations are goal-specific in nature, at  
245 least at the end of learning. Specifically, neural ensembles in the rodent homologue of  
246 mPFC have been demonstrated to represent higher order goal states that relate stimuli  
247 to behaviorally-relevant value (Farovik et al., 2015; Lopatina et al., 2017). Similarly, one  
248 human neuroimaging study recently localized latent representations of a complex task  
249 space relating 16 different goal states to mPFC activation patterns (Schuck et al., 2016).  
250 Importantly, these mPFC representations of goal states predicted participants'  
251 behavioral performance, supporting the notion that mPFC organizes knowledge based  
252 on goals to promote flexible behaviors.

253  
254 Our findings provide important evidence for the role of mPFC during the *formation* of  
255 conceptual maps of experience. Although theoretical perspectives highlight the



256 important of mPFC in cognitive map formation (Wikenheiser & Schoenbaum, 2016;  
257 Wilson et al., 2014), empirical work has failed to directly examine the computations of  
258 mPFC contributions during encoding. Instead, evidence is limited to representations that  
259 are established after long periods of training (Constantinescu et al., 2016; Schuck et al.,  
260 2016). Relatedly, most current models of mPFC function in memory focus on its role in  
261 biasing reactivation of relevant prior experiences via the hippocampus (e.g., Miller &  
262 Cohen, 2001). Few directly address mPFC's impact at encoding, despite the fact that  
263 there is neuroimaging evidence for interactions between mPFC and memory centers  
264 during encoding (Mack, Love, & Preston, 2016; Schlichting & Preston, 2016; van  
265 Kesteren et al., 2010; Zeithamova et al., 2012). Our findings provide novel evidence for  
266 mPFC's important role in encoding processes that build goal-specific mental models. By  
267 linking mPFC coding to the learning mechanisms defined in SUSTAIN, our results  
268 suggest that mPFC influences encoding through dimensionality reduction wherein  
269 selective attention highlights goal-specific information and discards irrelevant  
270 dimensions. That mPFC was the only region identified in our analysis suggests that this  
271 influence is direct: inputs to mPFC are directly weighted to select goal-related  
272 information and discard irrelevant features. These weightings may then be fed back to  
273 memory centers (i.e., hippocampus) to impact neural coding of learning experiences  
274 (Mack et al., 2016).

275  
276 Our hypothesized view of mPFC function is based on SUSTAIN's formalism of highly  
277 interactive mechanisms of selective attention and learning (Love et al., 2004), functions  
278 theoretically mapped onto interactions between PFC and the hippocampus (Love &  
279 Gureckis, 2007; Mack et al., 2016). Support for this view is found in recent patient work  
280 that has demonstrated a causal link between attentional processes and mPFC function  
281 in decision making (Noonan, Chau, Rushworth, & Fellows, 2017; Vaidya & Fellows,  
282 2015, 2016). These studies have shown that lesions to ventral mPFC disrupt attentional  
283 guidance based on prior experience with cue-reward associations (Vaidya & Fellows,  
284 2015), learning the value of task-diagnostic features during probabilistic learning  
285 (Vaidya & Fellows, 2016), and value comparison during reinforcement learning (Noonan  
286 et al., 2017). Relatedly, recent rodent work demonstrates the bidirectional flow of  
287 information between mPFC and hippocampus during context-guided memory encoding  
288 and retrieval (Place, Farovik, Brockmann, & Eichenbaum, 2016). Coupled with the  
289 recent demonstration of hippocampal-mPFC functional coupling during concept learning  
290 (Mack et al., 2016), the current findings align well with the view that mPFC is critical for  
291 evaluating and representing information in learning and decision making.

292  
293 In summary, we show that learning can be viewed as a process of goal-directed  
294 dimensionality reduction and that such a mechanism is apparent in mPFC neural

295 representations throughout learning. Thus, mPFC plays a critical role not only in  
296 representing conceptual content, but in the process of *learning* concepts. Notably,  
297 dimensionality reduction through selective attention offers a reconciling account of many  
298 processes associated with mPFC including schema representation (Van Kesteren,  
299 Ruiters, Fernández, & Henson, 2012), latent causal models (Schuck et al., 2016), grid-  
300 like conceptual maps (Constantinescu et al., 2016), and value coding (Clithero &  
301 Rangel, 2013; Grueschow, Polania, Hare, & Ruff, 2015).

302

303

## 304 **Materials and Methods**

305

### 306 *Participants*

307

308 Twenty-three volunteers (11 females, mean age 22.3 years old, ranging from 18 to 31  
309 years) participated in the experiment. All subjects were right handed, had normal or  
310 corrected-to-normal vision, and were compensated \$75 for participating. One participant  
311 did not perform above chance in one of the learning problems, thus was excluded from  
312 analysis.

313

### 314 *Stimuli*

315

316 Eight color images of insects were used in the experiment (Figure 1A). The insect  
317 images consisted of one body with different combinations of three features: legs, mouth,  
318 and antennae. There were two versions of each feature (pointy or rounded tail, thick or  
319 thin legs, and shovel or pincer mandible). The eight insect images included all possible  
320 combinations of the three features. The stimuli were sized to 300 x 300 pixels.

321

### 322 *Procedures for the learning problems*

323

324 After an initial screening and consent in accordance with the University of Texas  
325 Institutional Review Board, participants were instructed on the classification learning  
326 problems. Participants then performed the problems in the MRI scanner by viewing  
327 visual stimuli back-projected onto a screen through a mirror attached onto the head coil.  
328 Foam pads were used to minimize head motion. Stimulus presentation and timing was  
329 performed using custom scripts written in Matlab (Mathworks) and Psychtoolbox  
330 ([www.psychtoolbox.org](http://www.psychtoolbox.org)) on an Apple Mac Pro computer running OS X 10.7.

331

332 Participants were instructed to learn to classify the insects based on the combination of  
333 the insects' features using the feedback displayed on each trial. As part of the initial

334 instructions, participants were made aware of the three features and the two different  
335 values of each feature. Before beginning each classification problem, additional  
336 instructions that described the cover story for the current problem and which buttons to  
337 press for the two insect classes were presented to the participants. One example of this  
338 instruction text is as follows: “Each insect prefers either Warm or Cold temperatures.  
339 The temperature that each insect prefers depends on one or more of its features. On  
340 each trial, you will be shown an insect and you will make a response as to that insect’s  
341 preferred temperature. Press the 1 button under your index finger for Warm  
342 temperatures or the 2 button under your middle finger for Cold temperatures.” The other  
343 two cover stories involved classifying insects into those that live in the Eastern vs.  
344 Western hemisphere and those that live in an Urban vs. Rural environment. The cover  
345 stories were randomly paired with the three learning problems for each participant. After  
346 the instruction screen, the four fMRI scanning runs (described below) for that problem  
347 commenced, with no further problem instructions. After the four scanning runs for a  
348 problem finished, the next problem began with the corresponding cover story  
349 description. Importantly, the rules that defined the classification problems were not  
350 included in any of the instructions; rather, participants had to learn these rules through  
351 trial and error.

352  
353 The three problems the participants learned were structured such that perfect  
354 performance required attending to a distinct set of feature attributes (Figure 1A). For the  
355 low complexity problem, class associations were defined by a rule depending on the  
356 value of one feature attribute. For the medium complexity problem, class associations  
357 were defined by an XOR logical rule that depended on the value of the two feature  
358 attributes that were not relevant in the low complexity problem. For the high complexity  
359 problem, class associations were defined such that all feature attributes had to be  
360 attended to respond correctly. As such, different features were relevant for the three  
361 problems and successful learning required a shift in attending to and representing those  
362 feature attributes most relevant for the current problem. Critically, by varying the number  
363 of diagnostic feature attributes across the three problems, the representational space  
364 for each problem had a distinct informational complexity.

365  
366 The binary values of the eight insect stimuli along with the class association for the  
367 three learning problems are depicted in Table 1. The stimulus features were randomly  
368 mapped onto the attributes for each participant. These feature-to-attribute mappings  
369 were fixed across the different classification learning problems within a participant. After  
370 the high complexity problem, participants learned the low and medium problems in  
371 sequential order. The learning order of the low and medium problems was

372 counterbalanced across participants. This problem order was used for purposes  
373 described in a prior analysis of this data (Mack et al., 2016).

374

| stimulus | feature attribute |   |   | problem complexity |        |      |
|----------|-------------------|---|---|--------------------|--------|------|
|          | 1                 | 2 | 3 | low                | medium | High |
| 1        | 0                 | 0 | 0 | A                  | A      | B    |
| 2        | 0                 | 0 | 1 | A                  | B      | A    |
| 3        | 0                 | 1 | 0 | A                  | B      | A    |
| 4        | 0                 | 1 | 1 | A                  | A      | B    |
| 5        | 1                 | 0 | 0 | B                  | A      | A    |
| 6        | 1                 | 0 | 1 | B                  | B      | B    |
| 7        | 1                 | 1 | 0 | B                  | B      | B    |
| 8        | 1                 | 1 | 1 | B                  | A      | A    |

375

376 **Table 1:** Stimulus features and class associations for the three learning problems. Each of the eight  
377 stimuli are represented by the binary values of the three feature attributes. The stimuli are assigned to  
378 different classes (A or B) across the low, medium, and high complexity learning problems according to  
379 rules that depend on one, two, or three of the feature attributes, respectively.

380

381 The classification problems consisted of learning trials (Figure 1a) during which an  
382 insect image was presented for 3.5s. During stimulus presentation, participants were  
383 instructed to respond to the insect's class by pressing one of two buttons on an fMRI-  
384 compatible button box. Insect images subtended  $7.3^\circ \times 7.3^\circ$  of visual space. The  
385 stimulus presentation period was followed by a 0.5-4.5s fixation. A feedback screen  
386 consisting of the insect image, text of whether the response was correct or incorrect,  
387 and the correct class was shown for 2s followed by a 4-8s fixation. The timing of the  
388 stimulus and feedback phases of the learning trials was jittered to optimize general  
389 linear modeling estimation of the fMRI data. Within one functional run, each of the eight  
390 insect images was presented in four learning trials. The order of the learning trials was  
391 pseudo randomized in blocks of sixteen trials such that the eight stimuli were each  
392 presented twice. One functional run was 194s in duration. Each of the learning  
393 problems included four functional runs for a total of sixteen repetitions for each insect  
394 stimulus. The entire experiment lasted approximately 65 minutes.

395

### 396 *Behavioral analysis*

397

398 Participant-specific learning curves were extracted for each problem by calculating the  
399 average accuracy across blocks of sixteen learning trials. These learning curves were  
400 used for the computational learning model analysis.

401

402 *Computational learning modeling*

403

404 Participant behavior was modeled with an established mathematical learning model,  
405 SUSTAIN (Love et al., 2004). SUSTAIN is a network-based learning model that  
406 classifies incoming stimuli by comparing them to memory-based knowledge  
407 representations of previously experienced stimuli. Sensory stimuli are encoded by  
408 SUSTAIN into perceptual representations based on the value of the stimulus features.  
409 The values of these features are biased according to attention weights operationalized  
410 as receptive fields on each feature attribute. During learning, these attention weight  
411 receptive fields are tuned to give more weight to diagnostic features. SUSTAIN  
412 represents knowledge as clusters of stimulus features and class associations that are  
413 built and tuned over the course of learning. New clusters are recruited and existing  
414 clusters updated according to the current learning goals. A full mathematical  
415 formulation of SUSTAIN is provided in its introductory publication (Love et al., 2004).

416

417 To characterize the attention weights participants formed during learning, we fit  
418 SUSTAIN to each participant's learning performance. First, SUSTAIN was initialized  
419 with no clusters and equivalent attention weights across the stimulus feature attributes.  
420 Then, stimuli were presented to SUSTAIN in the same order as a participant's  
421 experience, and model parameters were optimized to predict each participant's learning  
422 performance (mean accuracy averaged over blocks of 16 trials) in the three learning  
423 problems through a maximum likelihood genetic algorithm optimization method (Storn &  
424 Price, 1997). In the fitting procedure, the model state at the end of the first learning  
425 problem was used as the initial state for the second learning problem. In doing so,  
426 parameters were optimized to account for learning with the assumption that attention  
427 weights, and knowledge clusters learned from the first problem carried over to influence  
428 learning in the second problem. Similarly, model state from the second problem carried  
429 over and influenced early learning in the third problem. Thus, problem order effects are  
430 considered a natural consequence of our model fitting approach. The optimized  
431 parameters were then used to extract measures of feature attribute attention weights  
432 during the second half of learning in the three problems. Specifically, for each  
433 participant, the model parameters were fixed to the optimized values and the model was  
434 presented with the trial order experienced by the participant. After the model was  
435 presented with the first 96 of trials, the values of the feature attribute attention weights  
436 were extracted for each participant. This was repeated for each of the three learning  
437 problems. The average value and 95% confidence intervals of the SUSTAIN's five free  
438 parameters were:  $\gamma = 3.286 \pm 2.064$ ,  $\beta = 4.626 \pm 0.220$ ,  $\eta = 0.308 \pm 0.145$ ,  $d = 20.293 \pm$   
439  $5.724$ ,  $\tau_h = 0.112 \pm 0.039$ .

440

441 *MRI data acquisition*

442

443 Whole-brain imaging data were acquired on a 3.0T Siemens Skyra system at the  
444 University of Texas at Austin Imaging Research Center. A high-resolution T1-weighted  
445 MPRAGE structural volume (TR = 1.9s, TE = 2.43ms, flip angle = 9°, FOV = 256mm,  
446 matrix = 256x256, voxel dimensions = 1mm isotropic) was acquired for coregistration  
447 and parcellation. Two oblique coronal T2-weighted structural images were acquired  
448 perpendicular to the main axis of the hippocampus (TR = 13,150ms, TE = 82ms, matrix  
449 = 384x384, 0.4x0.4mm in-plane resolution, 1.5mm thru-plane resolution, 60 slices, no  
450 gap). High-resolution functional images were acquired using a T2\*-weighted multiband  
451 accelerated EPI pulse sequence (TR = 2s, TE = 31ms, flip angle = 73°, FOV = 220mm,  
452 matrix = 128x128, slice thickness = 1.7mm, number of slices = 72, multiband factor = 3)  
453 allowing for whole brain coverage with 1.7mm isotropic voxels.

454

455 *MRI data preprocessing and statistical analysis*

456

457 MRI data were preprocessed and analyzed using FSL 6.0 (Jenkinson, Beckmann,  
458 Behrens, Woolrich, & Smith, 2012) and custom Python routines. Functional images  
459 were realigned to the first volume of the seventh functional run to correct for motion,  
460 spatially smoothed using a 3mm full-width-half-maximum Gaussian kernel, high-pass  
461 filtered (128s), and detrended to remove linear trends within each run. Functional  
462 images were registered to the MPRAGE structural volume using Advanced  
463 Normalization Tools, version 1.9 (Avants et al., 2011).

464

465 *Neural compression analysis*

466

467 The goal of the neural compression analysis was to assess the informational complexity  
468 of the neural representations formed during the different learning problems. To index  
469 representational complexity, we measured the extent that neural activation patterns  
470 could be compressed into a smaller dimensional space according to principal  
471 component analyses (PCA). The compression analyses were implemented using  
472 PyMVPA (Hanke et al., 2009) and custom Python routines and were conducted on  
473 preprocessed and spatially smoothed functional data. First, whole brain activation  
474 patterns for each stimulus within each run were estimated using an event-specific  
475 univariate general linear model (GLM) approach (Mumford et al., 2012). This approach  
476 allowed us to model stable estimates of neural patterns for the eight insect stimuli  
477 across the trials in each learning problem. For each classification problem run, a GLM  
478 with separate regressors for stimulus presentation on each trial, modeled as 3.5s

479 boxcar convolved with a canonical hemodynamic response function (HRF), was  
480 conducted to extract voxel-wise parameter estimates for each trial. Additionally, trial-  
481 specific regressors for the feedback period of the learning trials (2s boxcar) and  
482 responses (impulse function at the time of response), as well as six motion parameters  
483 were included in the GLM. This procedure resulted in, for each participant, whole brain  
484 activation patterns for each trial in the three learning problems.

485  
486 We assessed the representational complexity of the neural measures of stimulus  
487 representation during learning with a searchlight method (Kriegeskorte et al., 2006).  
488 Using a searchlight sphere with a radius of 4 voxels (voxels per sphere: 242 mean, 257  
489 mode, 76 minimum, 257 maximum), we extracted a vector of activation values across  
490 all voxels within a searchlight sphere for all 32 trials within a problem run. These  
491 activation vectors were then submitted to PCA to assess the degree of correlation in  
492 voxel activation across the different trials. PCA was performed using the singular value  
493 decomposition method as implemented in the `decomposition.PCA` function of the `scikit-`  
494 `learn` (version 0.17.1) Python library. To characterize the amount of dimensional  
495 reduction possible in the neural representation, we calculated the number of principal  
496 components that were necessary to explain 90% of the variance ( $k$ ) in the activation  
497 vectors. We scaled this number into a compression score that ranged from 0 to 1,

498

499

$$compression = 1 - \frac{k}{n},$$

500

501 where  $n$  is equal to 32, the total number of activation patterns submitted to PCA. By  
502 definition, 32 PCs will account for 100% of the variance, but no compression. With this  
503 definition of neural compression, larger compression scores indicated fewer principal  
504 components were needed to explain the variance across trials in the neural data (i.e.,  
505 neural representations with lower dimensional complexity). In contrast, smaller  
506 compression scores indicated more principal components were required to explain the  
507 variance (i.e., neural representations with higher dimensional complexity). This neural  
508 compression searchlight was performed across the whole brain separately for each  
509 participant and each run of the three learning problems in native space.

510

511 Group-level analyses were performed on the neural compression maps calculated with  
512 the searchlight procedure. Each participant's compression maps were normalized to  
513 MNI space using ANTs (Avants et al., 2011) and combined into a group dataset. To  
514 identify brain regions that demonstrated neural compression that was consistent with  
515 the representational complexity of the learning problems, we performed a voxel-wise  
516 linear mixed effects regression analysis. The mixed effects model included factors of

517 problem complexity and learning block as fixed effects as well as participants as a  
518 random effect to predict neural compression. The interaction of problem complexity and  
519 learning block was the central effect of interest. We also included each participant's  
520 accuracy for the three problems within each learning block as a covariate. This  
521 regression model was evaluated at each voxel. A statistical map was constructed by  
522 saving the  $t$ -statistic of the interaction between complexity and learning block. The  
523 resulting statistical map was voxel-wise corrected at  $p = 0.001$  and cluster corrected at  $p$   
524  $= 0.05$  which corresponded to a cluster extent threshold of greater than 259 voxels. The  
525 cluster extent threshold was determined with AFNI (Cox, 1996) 3dClustSim (version  
526 16.3.12) using the *acf* option, second-nearest neighbor clustering, and 2-sided  
527 thresholding. The 3dClustSim software used was downloaded and compiled on  
528 November 21, 2016 and included fixes for the recently discovered errors of improperly  
529 accounting for edge effects in simulations of small regions and spatial autocorrelation in  
530 smoothness estimates (Eklund, Nichols, & Knutsson, 2016).

531  
532 We assessed the nature of the interaction in the mPFC cluster by extracting each  
533 participant's average neural compression score within the cluster for each problem  
534 across the four learning runs. The same linear mixed effects model described above  
535 was run on the extracted compression values. It is important to note that this analysis  
536 was conducted to characterize the interaction underlying the mPFC cluster and,  
537 therefore, does not represent a set of independent findings. The results of this model  
538 are shown in Table 2.

539

|                  | estimate | SE    | df    | $t$   | $p$                  |
|------------------|----------|-------|-------|-------|----------------------|
| intercept        | -2.260   | 0.632 | 218.4 | -3.58 | $4.3 \times 10^{-4}$ |
| block            | 0.789    | 0.164 | 219.1 | 4.82  | $2.7 \times 10^{-6}$ |
| complexity       | 0.566    | 0.252 | 140.6 | 2.24  | 0.0266               |
| accuracy         | 0.945    | 0.461 | 221.2 | 2.05  | 0.0415               |
| block:complexity | -0.321   | 0.074 | 253.8 | -4.36 | $1.9 \times 10^{-5}$ |

540

541 **Table 2:** Results of the linear mixed effects regression model predicting average neural compression  
542 within the mPFC region depicted in Figure 2B. The estimated values, standard errors (SE), Satterthwaite  
543 approximations of degrees of freedom (df),  $t$ -statistics, and  $p$  values are reported for each fixed effect.

544

#### 545 *Relating neural compression to behavioral signatures of selective attention*

546

547 To evaluate the relationship between neural compression and model-based estimates  
548 of attention weighting, we first extracted individual participant-based measures of each.  
549 Because we were interested in the outcome of learning, we focused on the final learning



550 block. The participant-specific average neural compression within the mPFC cluster was  
551 extracted for each learning problem. We used the SUSTAIN parameter estimates of  
552 stimulus dimension attention weights to calculate a signature of selective attention.  
553 Specifically, the attention weight estimates for the three stimulus dimensions in each  
554 problem were transformed to sum to 1, thus creating a probability distribution  
555 representing the likelihood of attention to the three features. For example, given the  
556 attention weights [0.1, 0.1, 0.8], there is a probability of 0.8 that attention will be directed  
557 to the third stimulus dimension on any one trial. We then calculated entropy (Davis,  
558 Love, & Preston, 2012) across the attention weights for each problem separately:

559

$$560 \quad \text{entropy} = -\sum_{i=1}^3 a_i \log_2 a_i,$$

561

562 such that  $a_i$  is the attention weight for stimulus dimension  $i$ . This entropy measure  
563 indexed the dispersion of attention across the stimulus dimensions. For example, high  
564 attention weight entropy means that attention is unselective with all three stimulus  
565 dimensions equally weighted. On the other hand, low entropy means that attention is  
566 highly predictive with the majority of weight on a single dimension. As such, the  
567 attention weight entropy index offers a unique signature for optimal attentional strategy  
568 across the three learning problems: the lowest entropy should be seen in the low  
569 complexity problem, an intermediate entropy for the medium complexity problem, and  
570 the highest entropy for the high complexity problem. The effect of problem complexity  
571 on both mPFC neural compression and attention weight entropy was assessed with  
572 linear mixed effects regression (see Figure 3A and 3B).

573

574 We next evaluated the relationship between mPFC neural compression and attention  
575 weight entropy on an individual participant basis with linear regression and several  
576 follow up analysis. We first mean centered both measures within participant and entered  
577 the resulting measures into a regression model with neural compression as a predictor  
578 of attention weight entropy (Figure 3C). We performed three additional analyses to  
579 assess the reliability of the regression results and to evaluate the influence of potential  
580 outliers. First, we reran the regression analysis with robust regression using a logistic  
581 weighting function. Robust regression accounts for potential outlier observations by  
582 down weighting observations that individually influence the estimation of a linear  
583 regression model between two variables. The weighting of each observation estimated  
584 in the robust regression analysis is depicted in Figure 2C as the relative size of the data  
585 points. Second, we identified and removed potential outliers by evaluating the  
586 standardized difference in fit statistic (DFFITS) for each observation. The standard  
587 DFFITS threshold of  $\pm 2\sqrt{(k+1)/n}$  (Aguinis et al., 2013) identified five observations as  
588 potential outliers (noted as a grey data point in Figure 3C). These observations were

589 excluded and the linear regression analysis was performed again. Third, we performed  
590 a nonparametric bootstrap analysis to assess the robustness of the regression findings.  
591 We randomly sampled participants' data with replacement from the compression and  
592 entropy observations 5000 times, calculating and storing the regression coefficient on  
593 each iteration. The 95% confidence interval of the resulting distribution of correlation  
594 coefficients was then compared to 0 to determine the robustness of the mPFC  
595 compression and attention weight entropy relationship (Figure 3D).

596

597

## 598 **Acknowledgments**

599

600 Thanks to Christiane Ahlheim for manuscript comments. M.L.M. was supported by an  
601 NSERC Discovery Grant and NIMH grant F32-MH100904; A.R.P. by NIMH grant R01-  
602 MH100121, and NSF CAREER Award 1056019; and B.C.L by Leverhulme Trust grant  
603 RPG-2014-075, Wellcome Trust Senior Investigator Award WT106931MA, and NICHD  
604 grant 1P01HD080679.

605

## 606 **Author Contributions**

607

608 All authors designed the experiment and wrote the paper. M.L.M. conducted the  
609 research and data analysis.

610

## 611 **Competing Interests**

612

613 The authors declare no competing interests.

614

615

616 **References**

617

618 Aguinis, H., Gottfredson, R. K., & Joo, H. (2013). Best-Practice Recommendations for  
619 Defining, Identifying, and Handling Outliers. *Organizational Research Methods*,  
620 *16*(2), 270–301. <https://doi.org/10.1177/1094428112470848>

621 Avants, B. B., Tustison, N. J., Song, G., Cook, P. a., Klein, A., & Gee, J. C. (2011). A  
622 reproducible evaluation of ANTs similarity metric performance in brain image  
623 registration. *NeuroImage*, *54*(3), 2033–2044.  
624 <https://doi.org/10.1016/j.neuroimage.2010.09.025>

625 Badre, D., Kayser, A. S., & D'Esposito, M. (2010). Frontal cortex and the discovery of  
626 abstract action rules. *Neuron*, *66*(2), 315–326.  
627 <https://doi.org/10.1016/j.neuron.2010.03.025>

628 Chan, S. C. Y., Niv, Y., & Norman, K. A. (2016). A Probability Distribution over Latent  
629 Causes, in the Orbitofrontal Cortex. *The Journal of Neuroscience*, *36*(30), 7817–28.  
630 <https://doi.org/10.1523/JNEUROSCI.0659-16.2016>

631 Clithero, J. A., & Rangel, A. (2013). Informatic parcellation of the network involved in the  
632 computation of subjective value. *Social Cognitive and Affective Neuroscience*, *9*(9),  
633 1289–1302. <https://doi.org/10.1093/scan/nst106>

634 Constantinescu, A. O., O'Reilly, J. X., & Behrens, T. E. J. (2016). Organizing conceptual  
635 knowledge in humans with a gridlike code. *Science*, *352*(6292), 1464–1468.  
636 <https://doi.org/10.1126/science.aaf0941>

637 Cox, R. W. (1996). AFNI: software for analysis and visualization of functional magnetic  
638 resonance neuroimages. *Computers and Biomedical Research*, *29*(29), 162–173.  
639 <https://doi.org/10.1006/cbmr.1996.0014>

640 Davis, T., Love, B. C., & Preston, A. R. (2012). Striatal and hippocampal entropy and  
641 recognition signals in category learning: Simultaneous processes revealed by  
642 model-based fMRI. *Journal of Experimental Psychology: Learning, Memory, and*  
643 *Cognition*, *38*(4), 821–839. <https://doi.org/10.1037/a0027865>

644 Eckart, C., & Young, G. (1936). The Approximation of One Matrix by Another Low Rank.  
645 *Psychometrika*, *1*(3), 211–218.

646 Eklund, A., Nichols, T. E., & Knutsson, H. (2016). Cluster failure: Why fMRI inferences  
647 for spatial extent have inflated false-positive rates. *Proceedings of the National*  
648 *Academy of Sciences*, *113*(33), 201602413.  
649 <https://doi.org/10.1073/pnas.1602413113>

650 Farovik, A., Place, R. J., McKenzie, S., Porter, B., Munro, C. E., & Eichenbaum, H.  
651 (2015). Orbitofrontal Cortex Encodes Memories within Value-Based Schemas and  
652 Represents Contexts That Guide Memory Retrieval. *Journal of Neuroscience*,  
653 *35*(21), 8333–8344. <https://doi.org/10.1523/JNEUROSCI.0134-15.2015>

654 Ghosh, V. E., Moscovitch, M., Melo Colella, B., & Gilboa, A. (2014). Schema  
655 representation in patients with ventromedial PFC lesions. *The Journal of*  
656 *Neuroscience*, *34*(36), 12057–70. [https://doi.org/10.1523/JNEUROSCI.0740-](https://doi.org/10.1523/JNEUROSCI.0740-14.2014)  
657 [14.2014](https://doi.org/10.1523/JNEUROSCI.0740-14.2014)

658 Gilboa, A., & Marlatte, H. (2017). Neurobiology of Schemas and Schema-Mediated

- 659 Memory. *Trends in Cognitive Sciences*, 14(0), 417–428.  
660 <https://doi.org/10.1016/j.tics.2017.04.013>
- 661 Grueschow, M., Polania, R., Hare, T. A., & Ruff, C. C. (2015). Automatic versus Choice-  
662 Dependent Value Representations in the Human Brain. *Neuron*, 85(4), 874–885.  
663 <https://doi.org/10.1016/j.neuron.2014.12.054>
- 664 Hanke, M., Halchenko, Y. O., Sederberg, P. B., Hanson, S. J., Haxby, J. V., & Pollmann,  
665 S. (2009). PyMVPA: A python toolbox for multivariate pattern analysis of fMRI data.  
666 *Neuroinformatics*, 7(1), 37–53. <https://doi.org/10.1007/s12021-008-9041-y>
- 667 Jenkinson, M., Beckmann, C. F., Behrens, T. E. J., Woolrich, M. W., & Smith, S. M.  
668 (2012). FSL. *NeuroImage*, 62(2), 782–90.  
669 <https://doi.org/10.1016/j.neuroimage.2011.09.015>
- 670 Kriegeskorte, N., Goebel, R., & Bandettini, P. (2006). Information-based functional brain  
671 mapping. *Proceedings of the National Academy of Sciences of the United States of*  
672 *America*, 103(10), 3863–3868.
- 673 Lopatina, N., Sadacca, B. F., McDannald, M. A., Styer, C. V., Peterson, J. F., Cheer, J.  
674 F., & Schoenbaum, G. (2017). Ensembles in medial and lateral orbitofrontal cortex  
675 construct cognitive maps emphasizing different features of the behavioral  
676 landscape. *Behavioral Neuroscience*, 131(3), 201–212.  
677 <https://doi.org/10.1037/bne0000195>
- 678 Love, B. C., & Gureckis, T. M. (2007). Models in search of a brain. *Cognitive, Affective,*  
679 *& Behavioral Neuroscience*, 7(2), 90–108.
- 680 Love, B. C., Medin, D., & Gureckis, T. M. (2004). SUSTAIN: A network model of  
681 category learning. *Psychological Review*, 111(2), 309–332.
- 682 Mack, M. L., Love, B. C., & Preston, A. R. (2016). Dynamic updating of hippocampal  
683 object representations reflects new conceptual knowledge. *Proceedings of the*  
684 *National Academy of Sciences*, 113(46), 13203–13208.  
685 <https://doi.org/10.1073/pnas.1614048113>
- 686 Mante, V., Sussillo, D., Shenoy, K. V., & Newsome, W. T. (2013). Context-dependent  
687 computation by recurrent dynamics in prefrontal cortex. *Nature*, 503(7474), 78–84.  
688 <https://doi.org/10.1038/nature12742>
- 689 Miller, E. K., & Cohen, J. D. (2001). An integrative theory of prefrontal cortex function.  
690 *Annual Review of Neuroscience*, 24(1), 167–202. Retrieved from  
691 <http://www.ncbi.nlm.nih.gov/pubmed/11283309>
- 692 Mumford, J. A., Turner, B. O., Ashby, F. G., & Poldrack, R. A. (2012). Deconvolving  
693 BOLD activation in event-related designs for multivoxel pattern classification  
694 analyses. *NeuroImage*, 59(3), 2636–2643.  
695 <https://doi.org/10.1016/j.neuroimage.2011.08.076>
- 696 Noonan, M. P., Chau, B. K. H., Rushworth, M. F. S., & Fellows, L. K. (2017).  
697 Contrasting Effects of Medial and Lateral Orbitofrontal Cortex Lesions on Credit  
698 Assignment and Decision-Making in Humans, 37(29), 7023–7035.  
699 <https://doi.org/10.1523/JNEUROSCI.0692-17.2017>
- 700 Place, R., Farovik, A., Brockmann, M., & Eichenbaum, H. (2016). Bidirectional  
701 prefrontal-hippocampal interactions support context-guided memory. *Nature*

- 702 *Neuroscience*, 19(8). Retrieved from  
703 <http://www.nature.com/doi/finder/10.1038/nn.4327>
- 704 Schlichting, M. L., Mumford, J. A., & Preston, A. R. (2015). Learning-related  
705 representational changes reveal dissociable integration and separation signatures  
706 in the hippocampus and prefrontal cortex. *Nature Communications*, 6, 8151.  
707 <https://doi.org/10.1038/ncomms9151>
- 708 Schlichting, M. L., & Preston, A. R. (2016). Hippocampal–medial prefrontal circuit  
709 supports memory updating during learning and post-encoding rest. *Neurobiology of*  
710 *Learning and Memory*, 134, 91–106. <https://doi.org/10.1016/j.nlm.2015.11.005>
- 711 Schuck, N. W., Cai, M. B., Wilson, R. C., Niv, Y., Schuck, N. W., Cai, M. B., ... Niv, Y.  
712 (2016). Human Orbitofrontal Cortex Represents a Cognitive Map of State Space  
713 Article Human Orbitofrontal Cortex Represents a Cognitive Map of State Space.  
714 *Neuron*, 91(6), 1402–1412. <https://doi.org/10.1016/j.neuron.2016.08.019>
- 715 Shepard, R. N., Hovland, C. I., & Jenkins, H. M. (1961). Learning and memorization of  
716 classification. *Psychological Monographs*, 75(13), 517.
- 717 Spalding, K. N., Jones, S. H., Duff, M. C., Tranel, D., & Warren, D. E. (2015).  
718 Investigating the Neural Correlates of Schemas: Ventromedial Prefrontal Cortex Is  
719 Necessary for Normal Schematic Influence on Memory. *J Neurosci*, 35(47), 15746–  
720 15751. <https://doi.org/10.1523/JNEUROSCI.2767-15.2015>
- 721 Storn, R., & Price, K. (1997). Differential evolution—a simple and efficient heuristic for  
722 global optimization over continuous spaces. *Journal of Global Optimization*, 11,  
723 341–359. <https://doi.org/10.1023/A:1008202821328>
- 724 Tse, D., Takeuchi, T., Kakeyama, M., Kajii, Y., Okuno, H., Tohyama, C., ... Morris, R.  
725 G. M. (2011). Schema-Dependent Gene Activation. *Science*, 333(August), 891–  
726 895. <https://doi.org/10.1126/science.1205274>
- 727 Vaidya, A. R., & Fellows, L. K. (2015). Ventromedial Frontal Cortex Is Critical for  
728 Guiding Attention to Reward-Predictive Visual Features in Humans. *Journal of*  
729 *Neuroscience*, 35(37). Retrieved from  
730 [http://www.jneurosci.org/content/35/37/12813?ijkey=55dfc953354fc3a0477599ff2f60f293580642d5&keytype2=tf\\_ipsecsha](http://www.jneurosci.org/content/35/37/12813?ijkey=55dfc953354fc3a0477599ff2f60f293580642d5&keytype2=tf_ipsecsha)  
731
- 732 Vaidya, A. R., & Fellows, L. K. (2016). Necessary Contributions of Human Frontal Lobe  
733 Subregions to Reward Learning in a Dynamic, Multidimensional Environment. *The*  
734 *Journal of Neuroscience*, 36(38), 9843–58.  
735 <https://doi.org/10.1523/JNEUROSCI.1337-16.2016>
- 736 van Kesteren, M. T. R., Fernández, G., Norris, D. G., & Hermans, E. J. (2010).  
737 Persistent schema-dependent hippocampal-neocortical connectivity during memory  
738 encoding and postencoding rest in humans. *Proceedings of the National Academy*  
739 *of Sciences of the United States of America*, 107(16), 7550–7555.  
740 <https://doi.org/10.1073/pnas.0914892107>
- 741 Van Kesteren, M. T. R., Ruiter, D. J., Fernández, G., & Henson, R. N. (2012). How  
742 schema and novelty augment memory formation. *Trends in Neurosciences*, 35(4),  
743 211–219. <https://doi.org/10.1016/j.tins.2012.02.001>
- 744 Wikenheiser, A. M., & Schoenbaum, G. (2016). Over the river, through the woods:

745 cognitive maps in the hippocampus and orbitofrontal cortex. *Nat Rev Neurosci*,  
746 17(8), 513–523. <https://doi.org/10.1038/nrn.2016.56>  
747 Wilson, R. C., Takahashi, Y. K., Schoenbaum, G., & Niv, Y. (2014). Orbitofrontal cortex  
748 as a cognitive map of task space. *Neuron*, 81(2), 267–278.  
749 <https://doi.org/10.1016/j.neuron.2013.11.005>  
750 Zeithamova, D., Dominick, A. L., & Preston, A. R. (2012). Hippocampal and Ventral  
751 Medial Prefrontal Activation during Retrieval-Mediated Learning Supports Novel  
752 Inference. *Neuron*, 75, 168–179. <https://doi.org/10.1016/j.neuron.2012.05.010>  
753
